# Supplementary material for: Potential of electrospray ionization mass spectrometry (ESI-MS), using direct infusion, to quantify fatty acid methyl esters (FAMEs) in biodiesel
Source: Royal Society of Chemistry journal article supplement (doi:10.1039/c7ay00644f), 2017-01-01
Supplement: c7ay00644f1.xlsx [file c7ay00644f1.xlsx]

## Sheet: Data set Concentration
Data sets of FAME concentrations and uncertainties for ESI-MS, GC-MS and GC-FID methods
Biodiesel	Method							FAME Concentration (g/Kg)
		C12:0	± U	C14:0	± U	C16:0	± U	C18:0	± U	C18:1	± U	C18:2	± U	C18:3	± U	C22:0	± U	C22:1	± U
	ESI-MS					0.03497	0.00840344	0.00318	0.000643266	0.11237	0.0195416	0.25842	0.0434687	0.04098	0.00718732
Soy	CG-MS					103.808	8.56835	29.6846	1.04888	218.795	17.4659	519.272	40.5876	63.5544	1.60525
	CG-FID					96.4493	6.48569	29.006	1.01831	204.783	13.7697	484.678	32.6223	59.361	3.06384
	ESI-MS					0.01071	0.00256815	0.00163	0.000369339	0.10773	0.0168813	0.12627	0.0180876	0.02997	0.00444411	0.00369	0.000600366	0.20374	0.0286293
Crambe	CG-MS					30.023	2.26922	14.4725	0.313339	171.154	12.9159	164.469	11.6117	33.4	0.684699	15.4153	0.314158	391.454	27.2988
	CG-FID					19.7484	1.4735	11.6026	0.469495	163.999	11.8378	156.11	11.3291	31.8787	1.17144	14.9634	0.313796	358.761	26.7336
	ESI-MS			0.00354	0.00110211	0.0223	0.00547139	0.0035	0.000818112	0.24167	0.0415919	0.15487	0.0239089	0.04656	0.00750968
Canola	CG-MS			0.6298	0.0327851	59.0294	4.87319	27.7436	1.42176	427.726	33.021	252.667	19.6373	64.5028	1.56139
	CG-FID			0.35238	0.0100996	54.7368	4.34999	27.5254	1.25861	415.255	32.8181	248.057	19.5213	60.8335	1.91917
	ESI-MS	0.17329	0.0843665	0.06762	0.0267863	0.02691	0.00878782	0.0127	0.00360325	0.02821	0.00708689	0.00685	0.00136155
Coconut	CG-MS	430.892	31.8701	173.726	12.8393	74.6035	5.52555	22.7493	0.864454	59.5074	4.97047	16.3256	0.221486
	CG-FID	445.839	33.088	178.19	13.2489	71.9525	5.41818	21.5895	0.922353	56.733	4.26747	16.0995	0.477617
Data sets of FAME standardized concentrations and uncertainties for ESI-MS, GC-MS and GC-FID methods
Biodiesel	Method							FAME Standardized (z)
		C12:0	± uz	C14:0	± uz	C16:0	± uz	C18:0	± uz	C18:1	± uz	C18:2	± uz	C18:3	± uz	C22:0	± uz	C22:1	± uz
	ESI-MS					-0.53791	0.04108	-0.84881	0.00314	0.2189	0.09553	1.6470	0.21251	-0.47918	0.03513
Soy	CG-MS					-0.41827	0.02153	-0.79084	0.00263	0.15969	0.04389	1.67001	0.1020	-0.6206	0.00403
	CG-FID					-0.42267	0.01748	-0.78624	0.00274	0.16133	0.03711	1.67018	0.08792	-0.6226	0.00825
	ESI-MS					-0.74706	0.01642	-0.86324	0.00236	0.49415	0.10798	0.73134	0.11569	-0.50068	0.02842	-0.83688	0.00384	1.72237	0.18312
Crambe	CG-MS					-0.62724	0.00816	-0.73912	0.00112	0.38821	0.04646	0.34011	0.04177	-0.60294	0.00246	-0.73234	0.00113	1.97331	0.0982
	CG-FID					-0.68524	0.00571	-0.74838	0.00181	0.43288	0.04587	0.37173	0.0439	-0.59121	0.00454	-0.72233	0.00121	1.94254	0.10361
	ESI-MS			-0.76852	0.00563	-0.57674	0.02795	-0.76885	0.00418	1.66499	0.21251	0.77796	0.12216	-0.32884	0.03837
Canola	CG-MS			-0.82595	0.00009	-0.47664	0.01457	-0.66377	0.00425	1.72869	0.09875	0.68158	0.05872	-0.4439	0.00466
	CG-FID			-0.82243	0.00003	-0.48891	0.01333	-0.65578	0.00385	1.72201	0.10063	0.69664	0.05985	-0.45152	0.00588
	ESI-MS	1.92127	0.67151	0.2391	0.2132	-0.40889	0.06994	-0.63509	0.02867	-0.38818	0.0564	-0.72821	0.01083
Coconut	CG-MS	1.90601	0.10081	0.27896	0.04061	-0.34816	0.01747	-0.67624	0.00273	-0.44367	0.01572	-0.71688	0.0007
	CG-FID	1.90789	0.10048	0.28217	0.04023	-0.36311	0.01645	-0.66902	0.0028	-0.45556	0.01296	-0.70237	0.00145
